# Supplementary material for: Dihydropyrazoles containing morpholine: design, synthesis and bioassay testing as potent antimicrobial agents
Source: Royal Society of Chemistry journal article supplement (doi:10.1039/c4ra15201h), 2015-01-01

**Dihydropyrazoles Containing Morpholine: Design, Synthesis and Bioassay as Potent Antimicrobial Agents**

**ESI**

**NMR and MS data**

4a

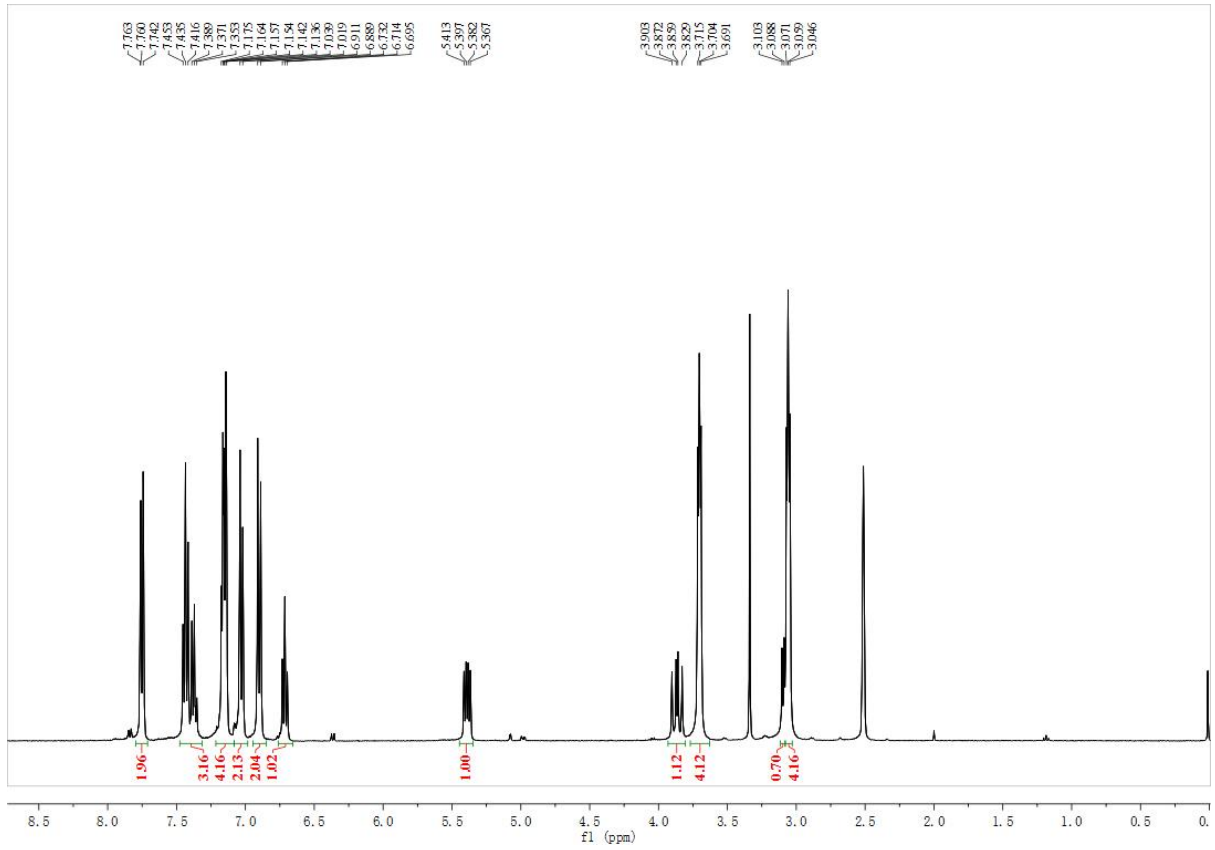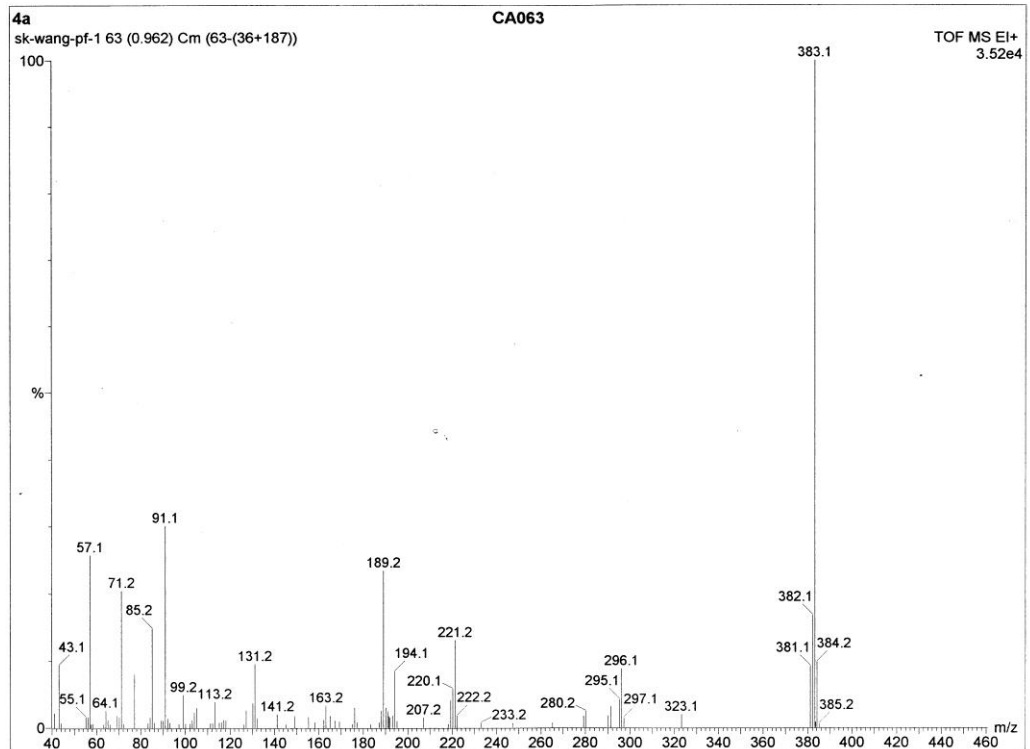

4b

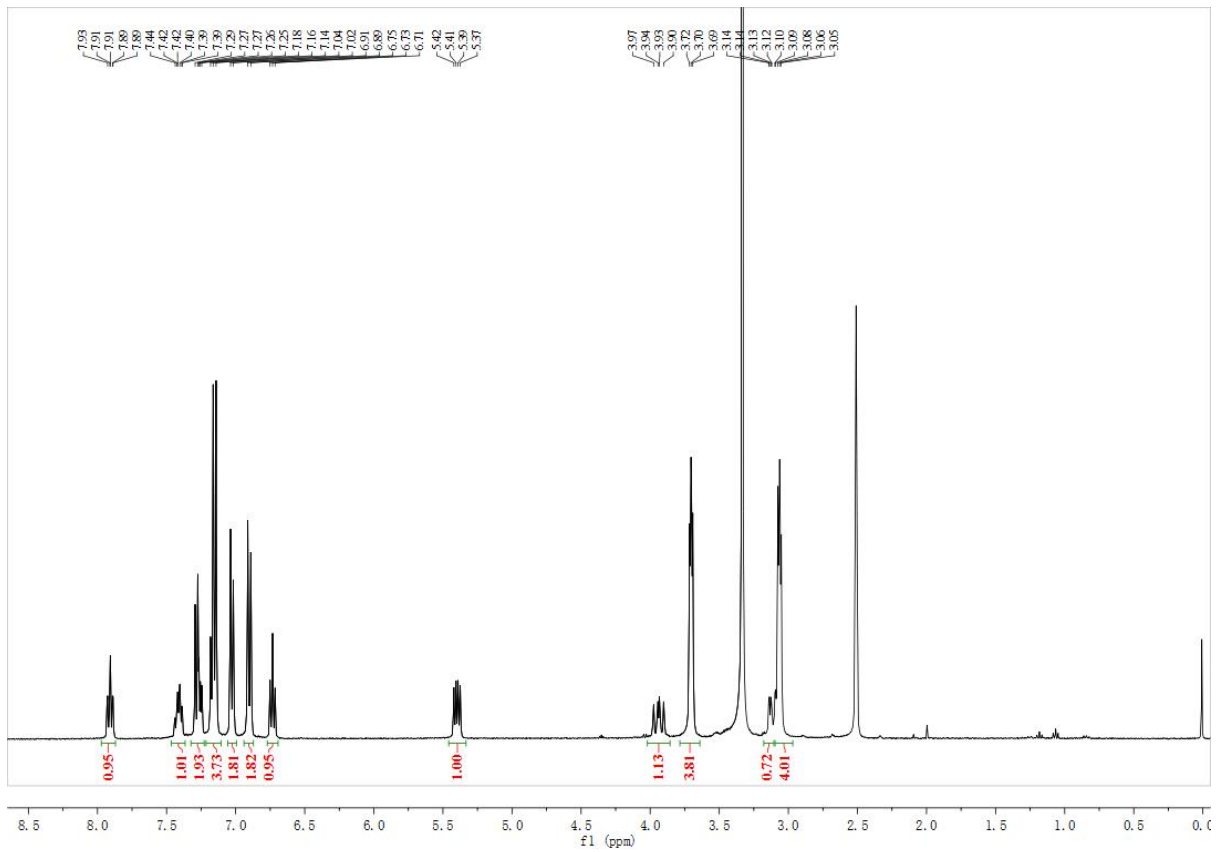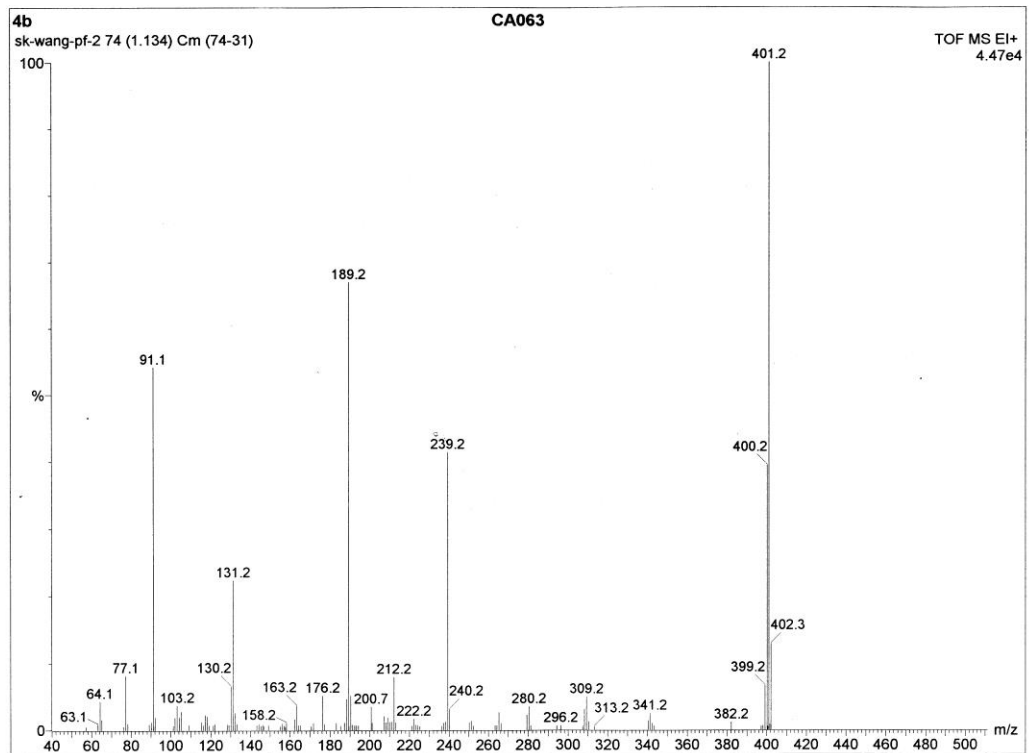

4c

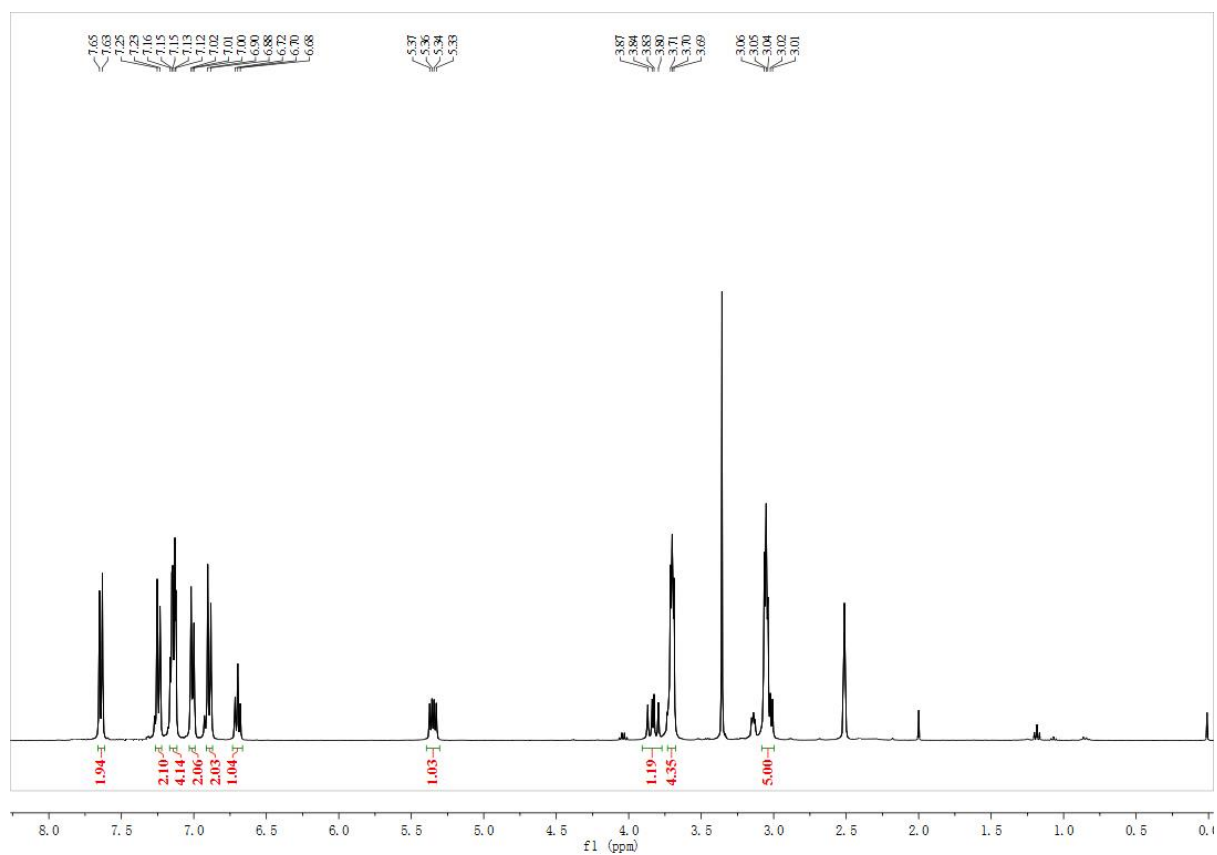

4d

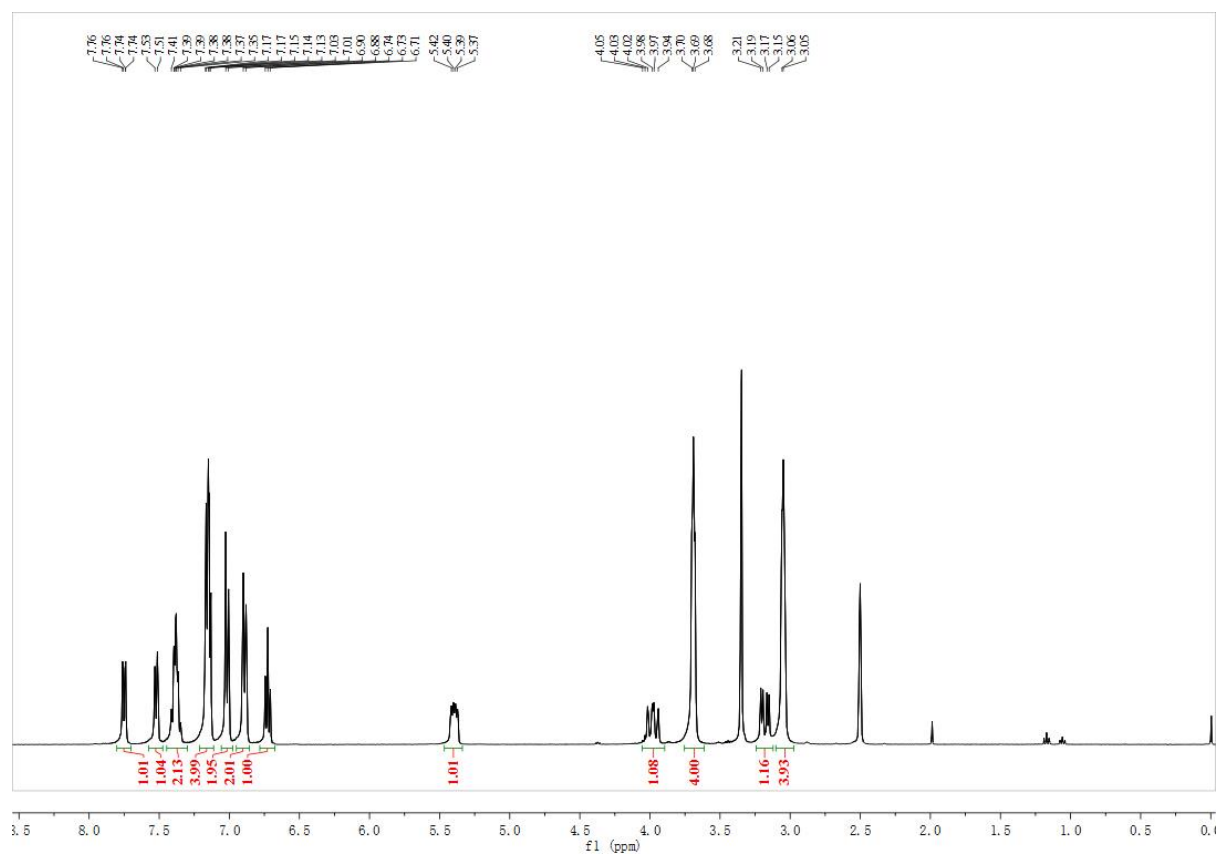

4e

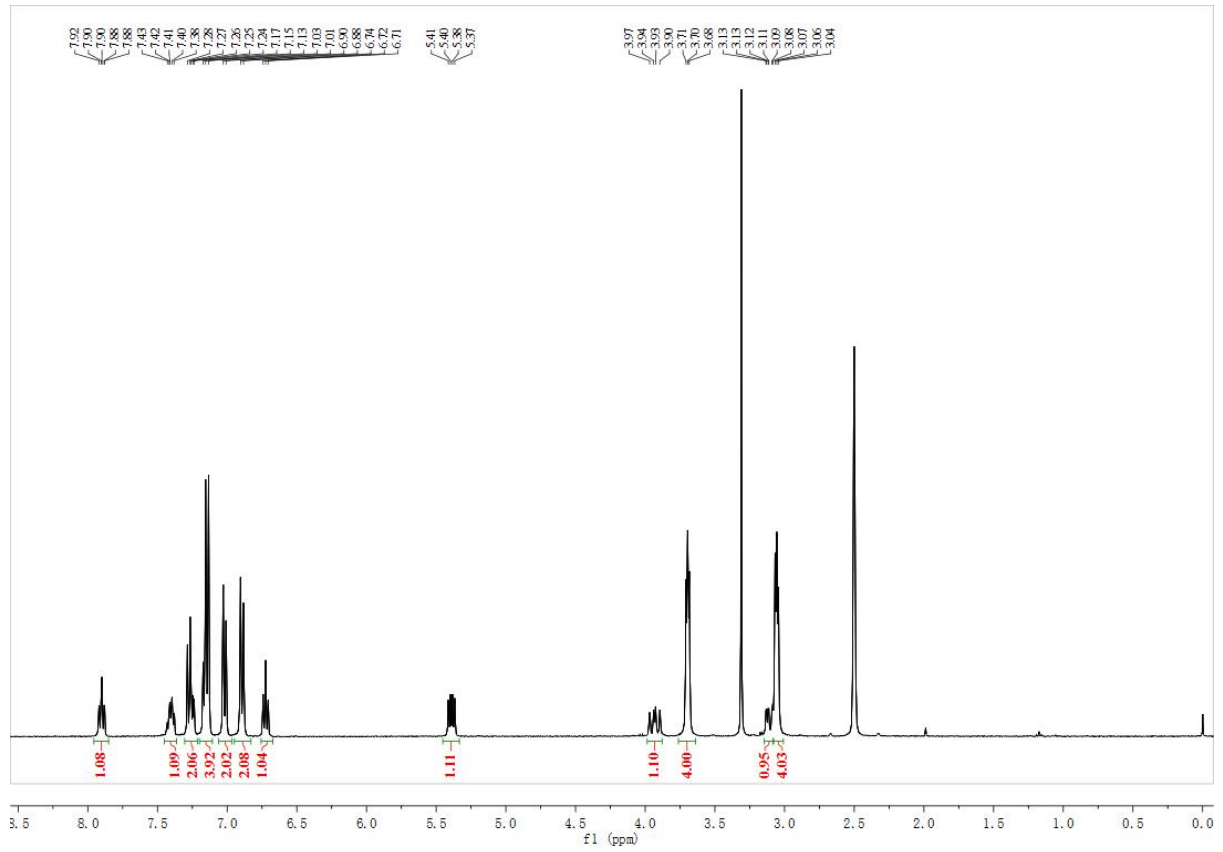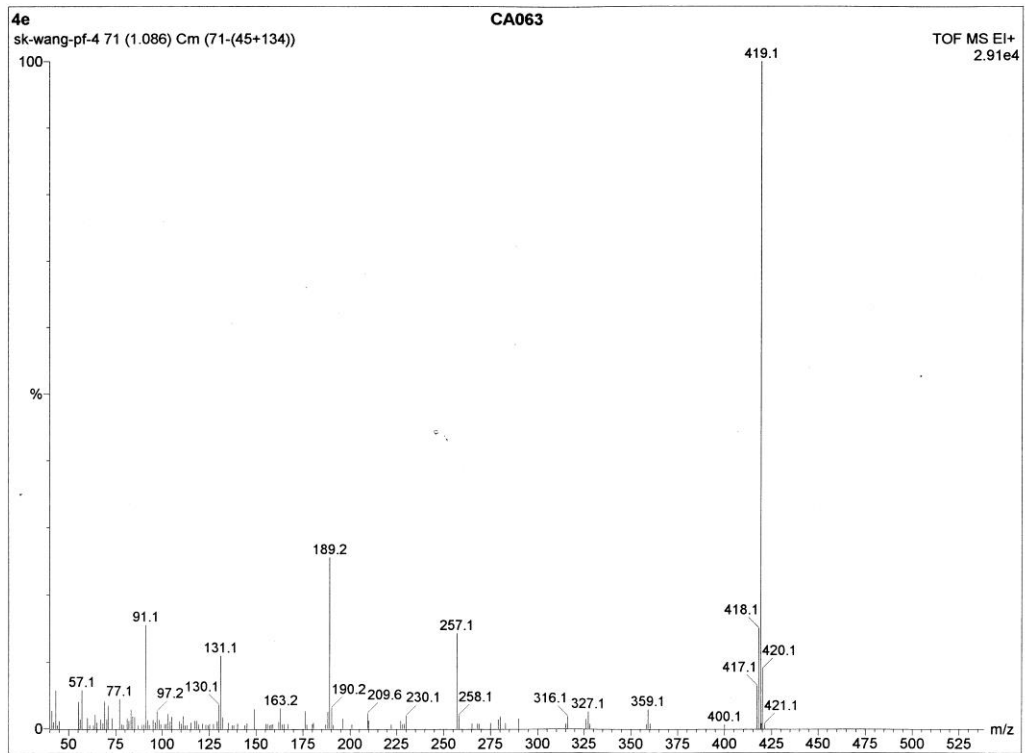

4f

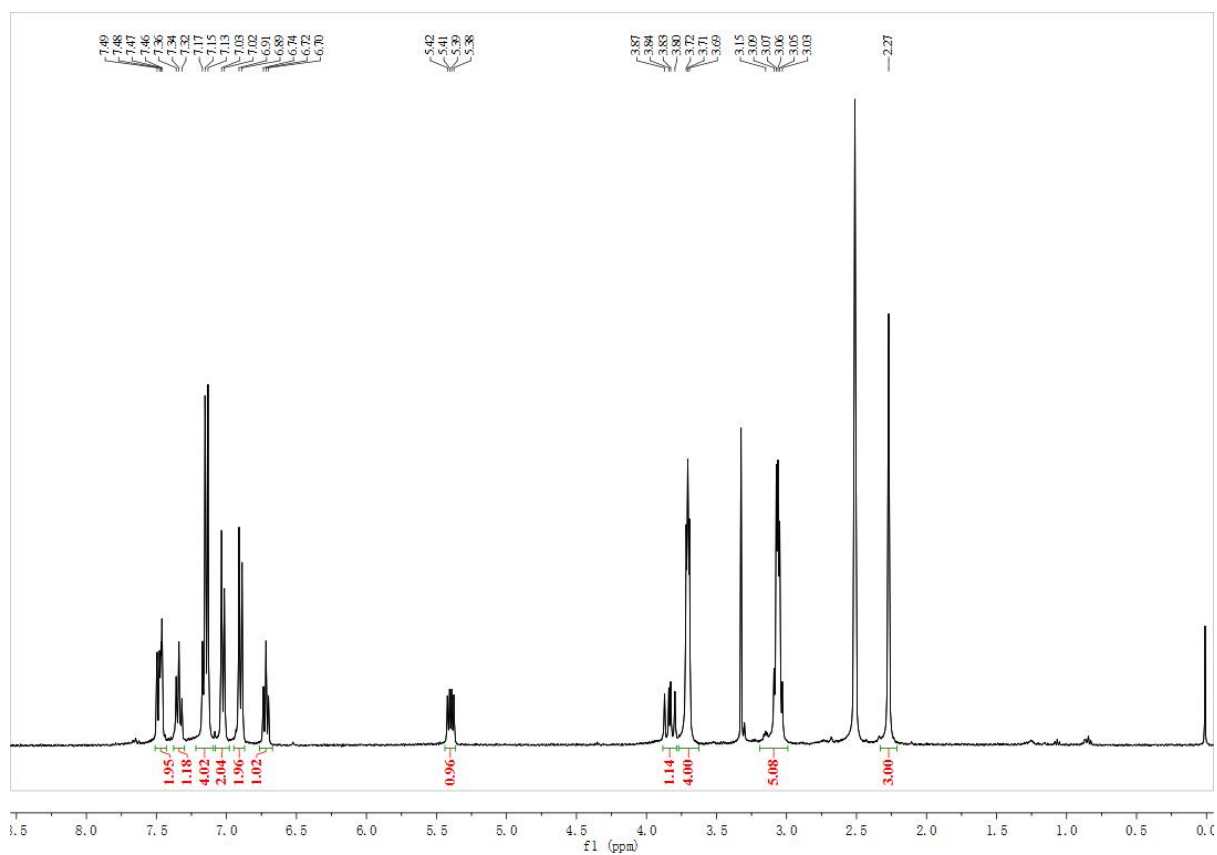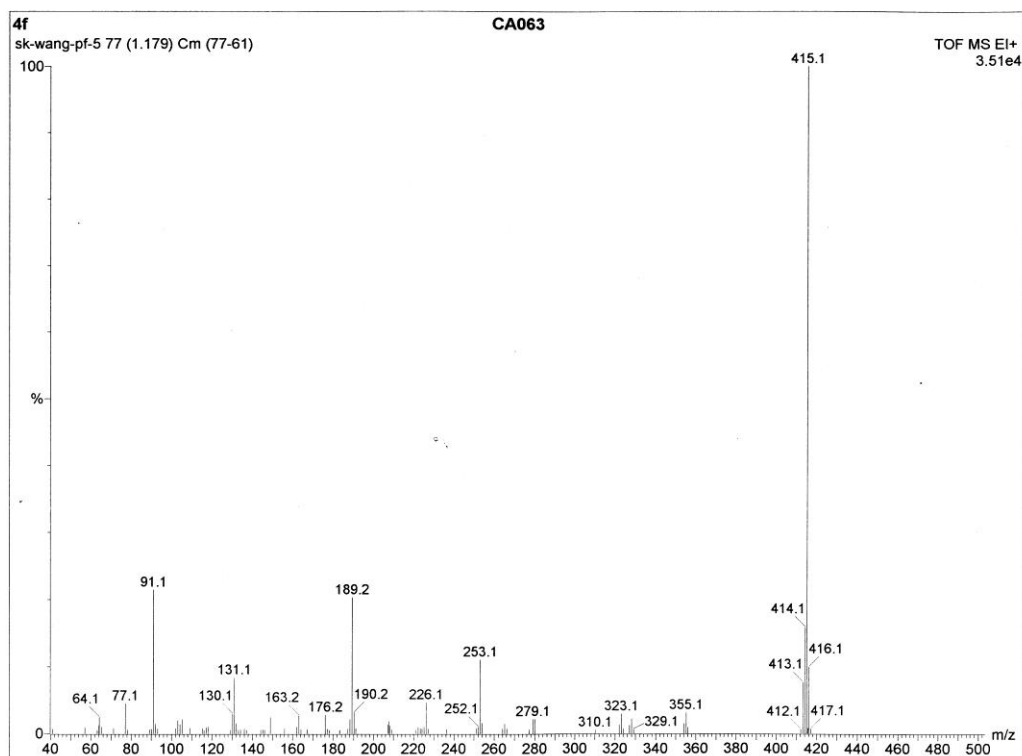

4g

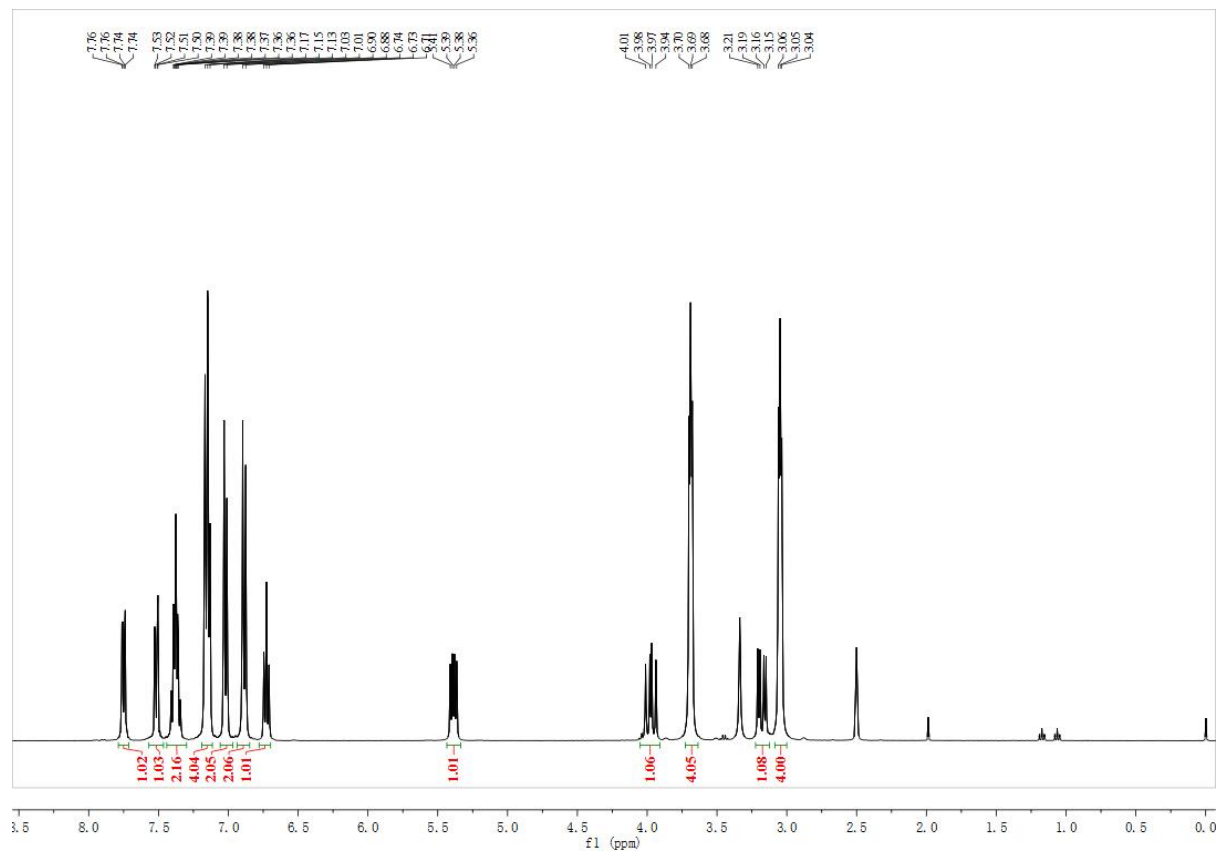



4h

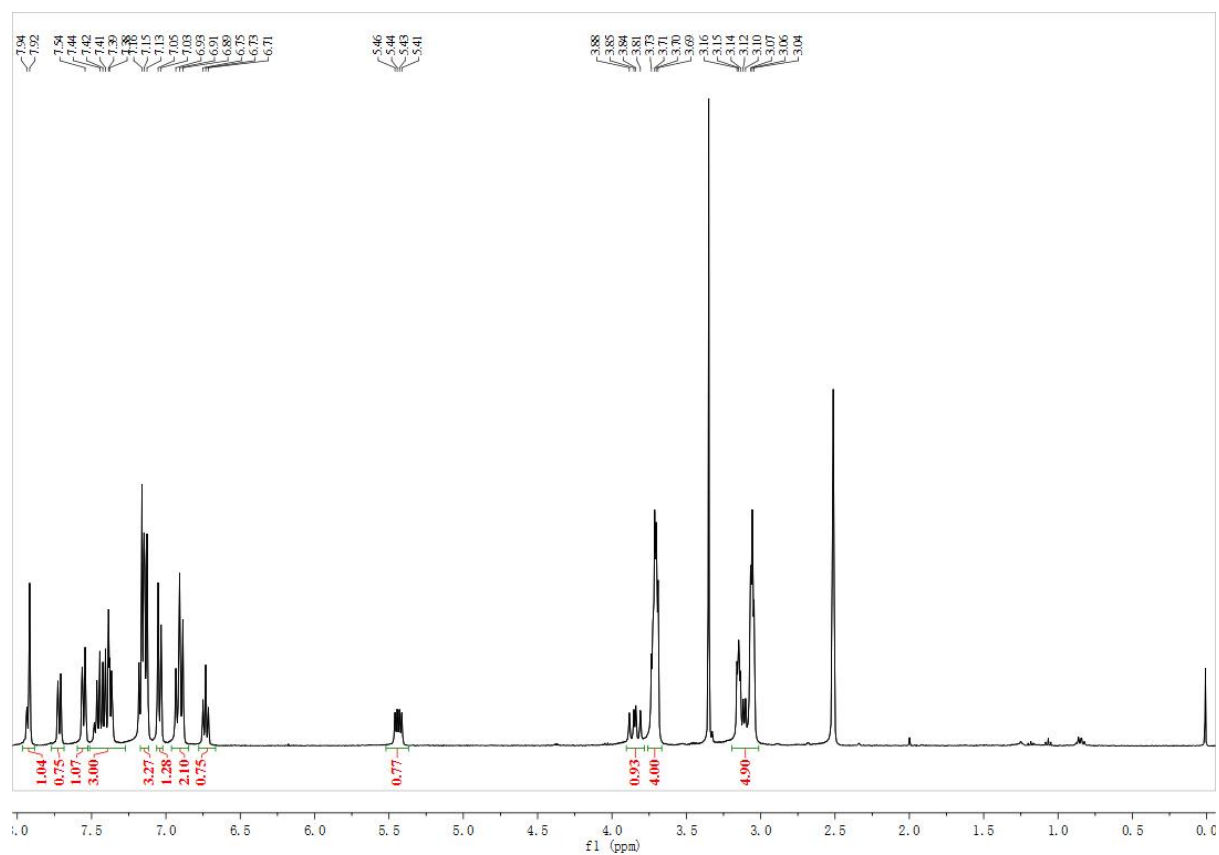

4i

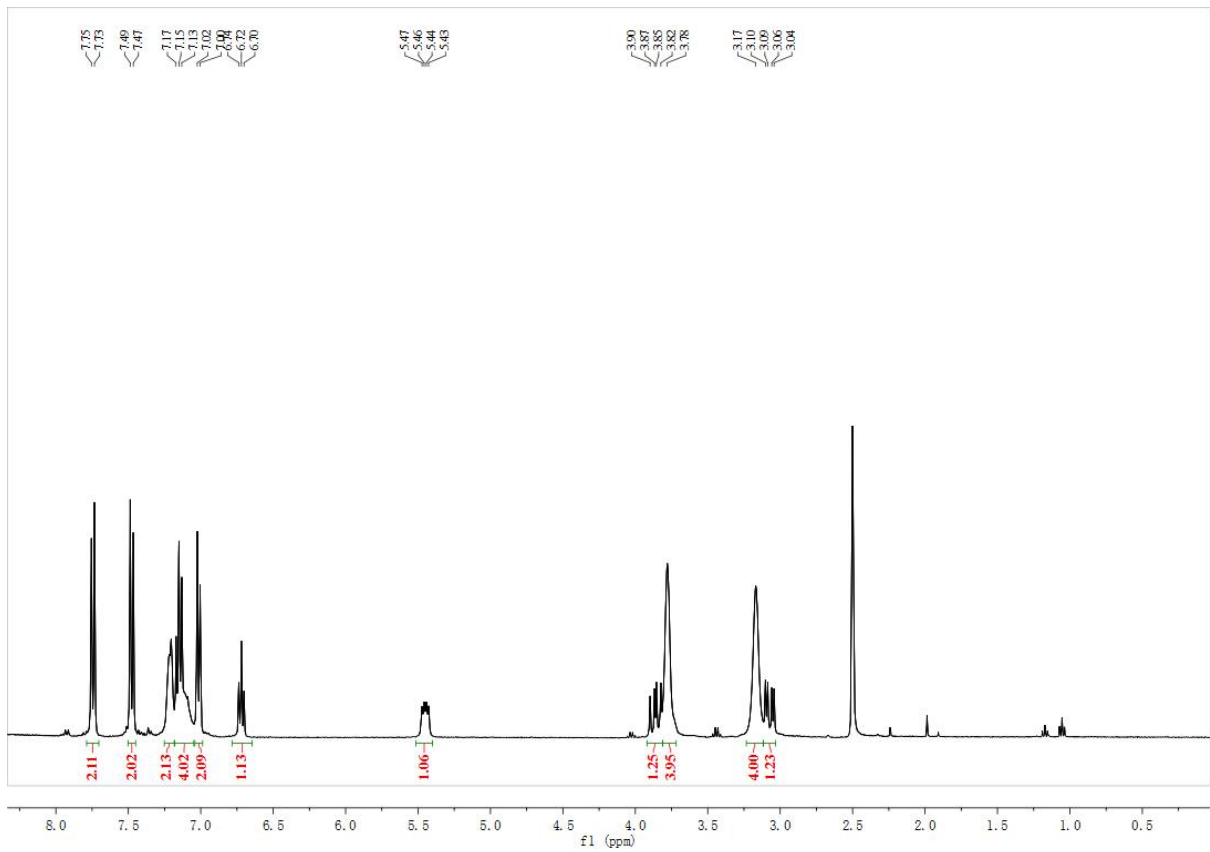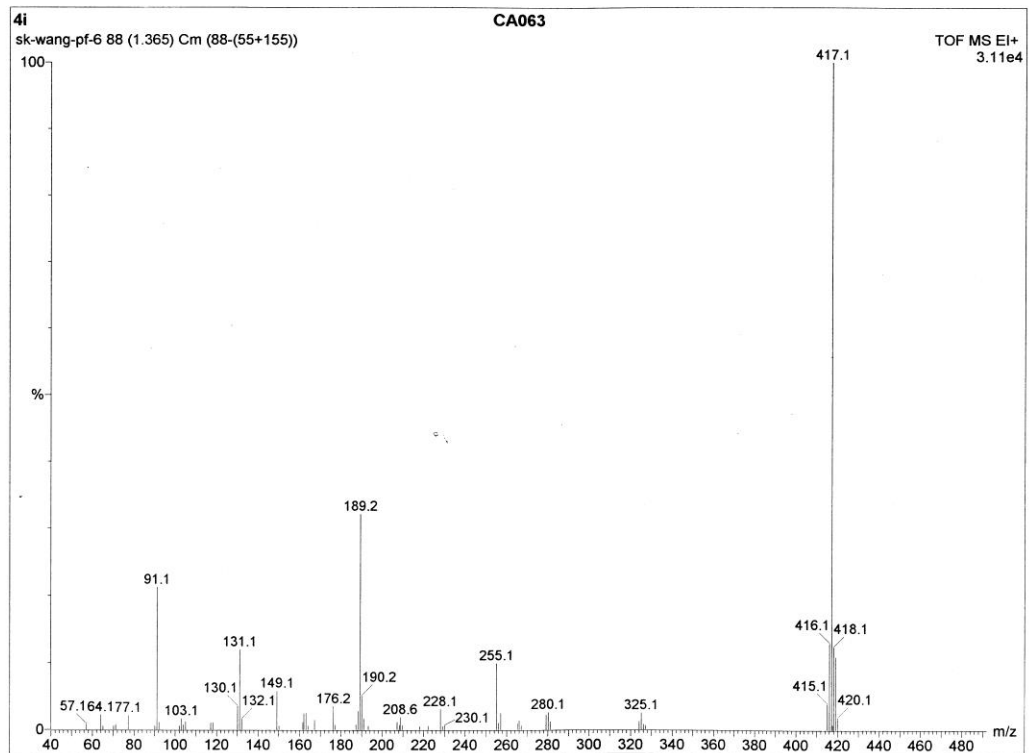

4j

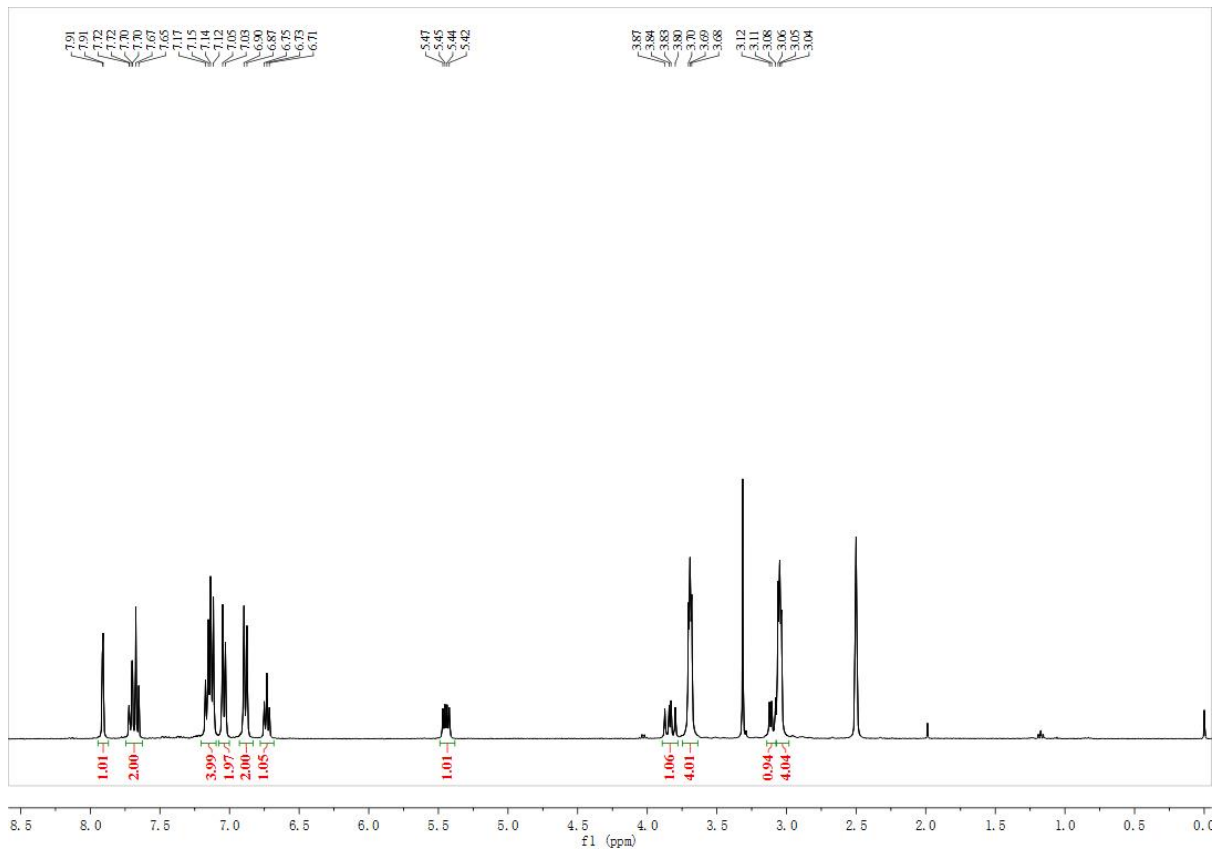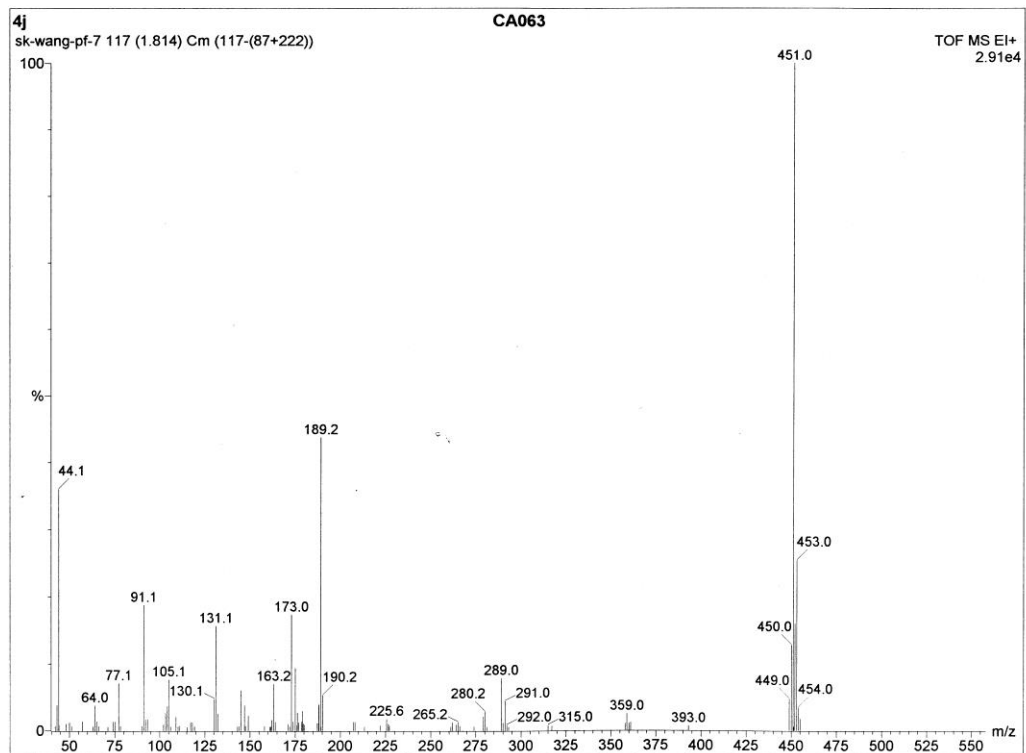

4k

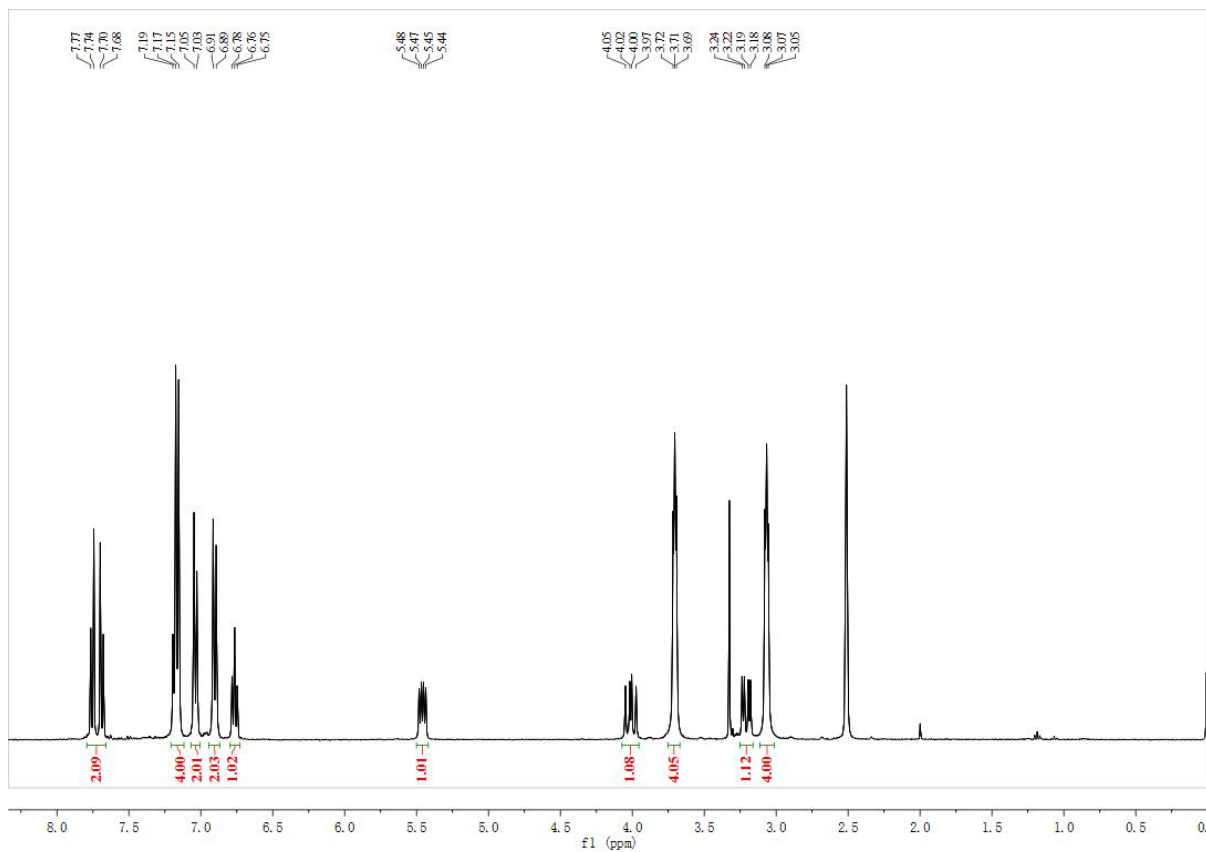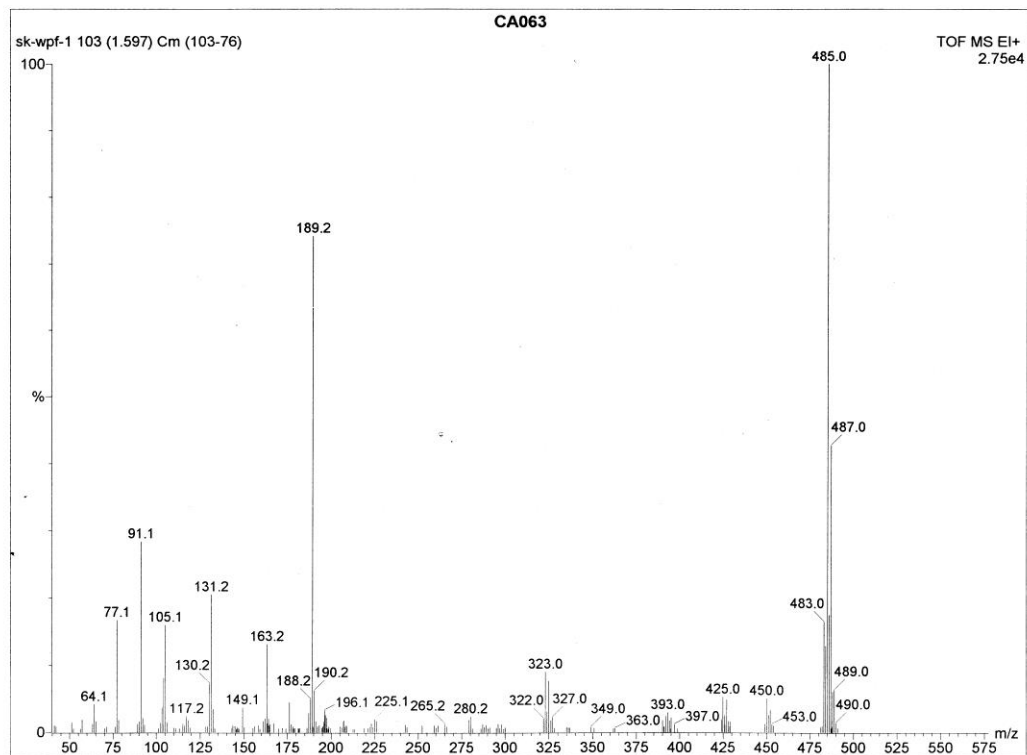

41

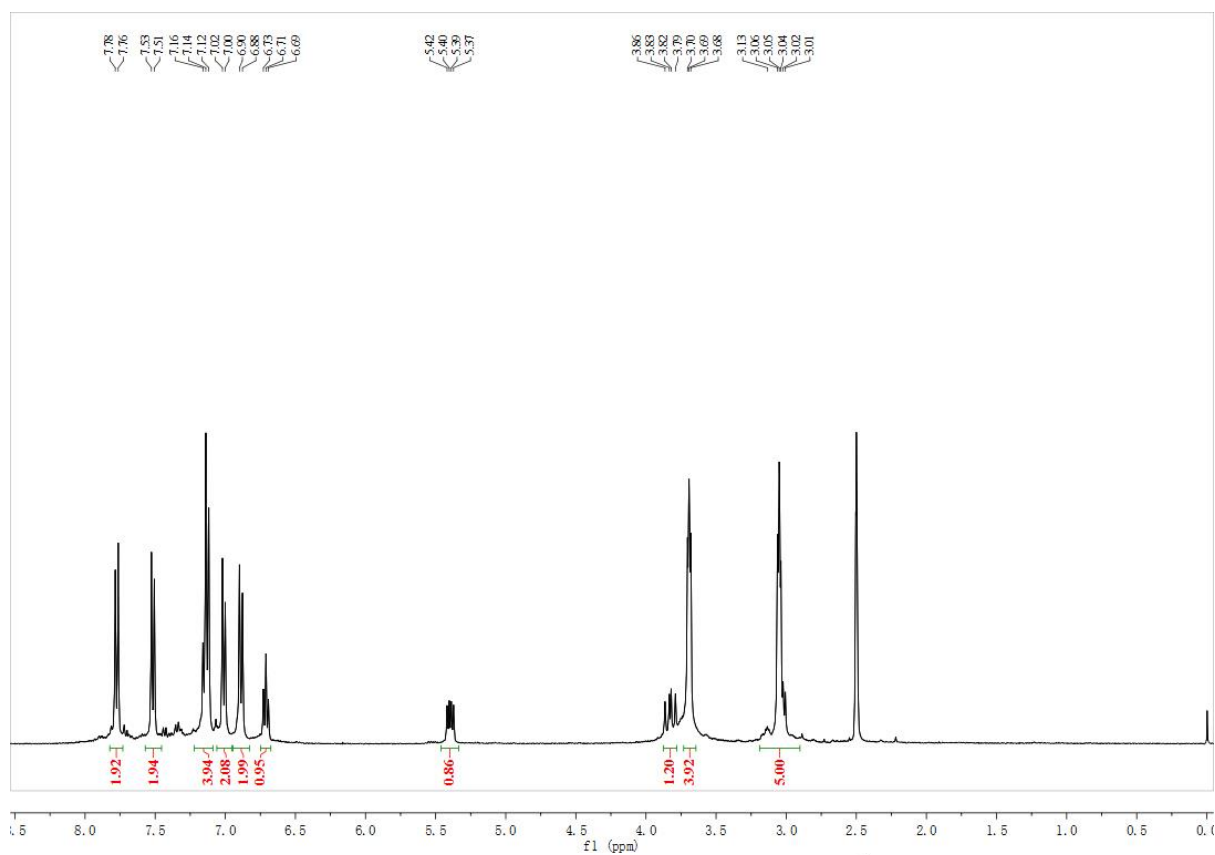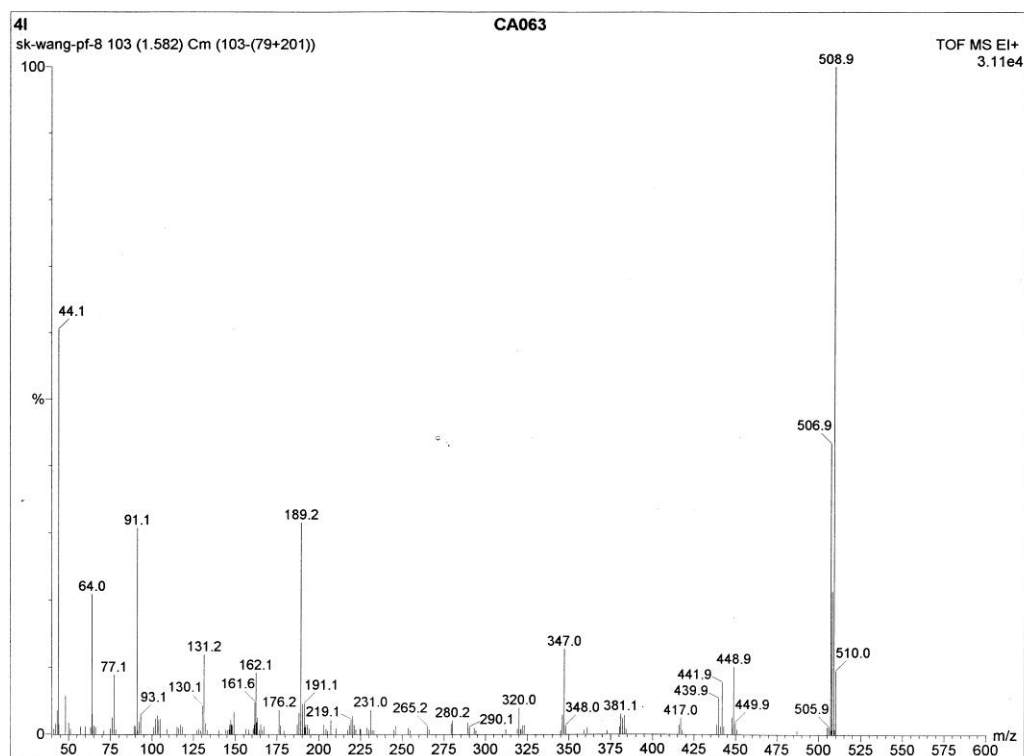

4m

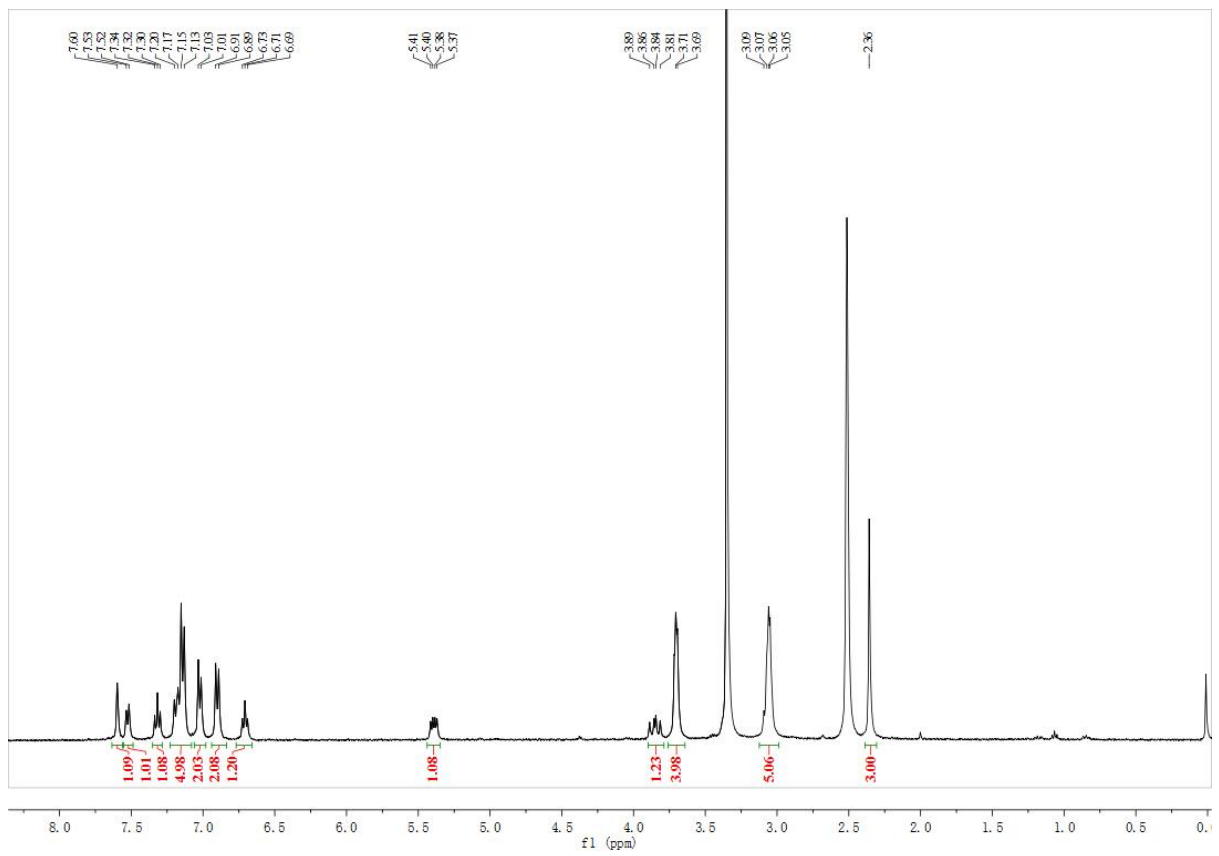

4n

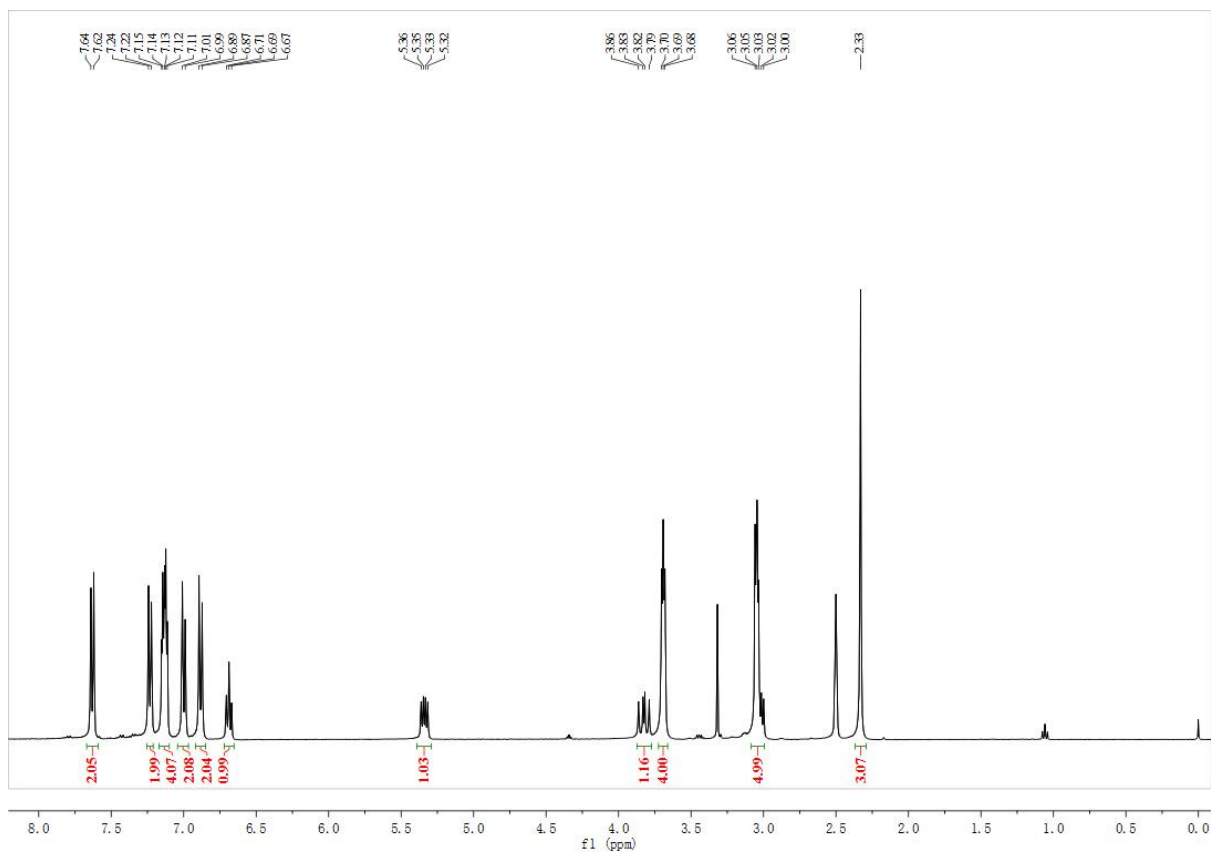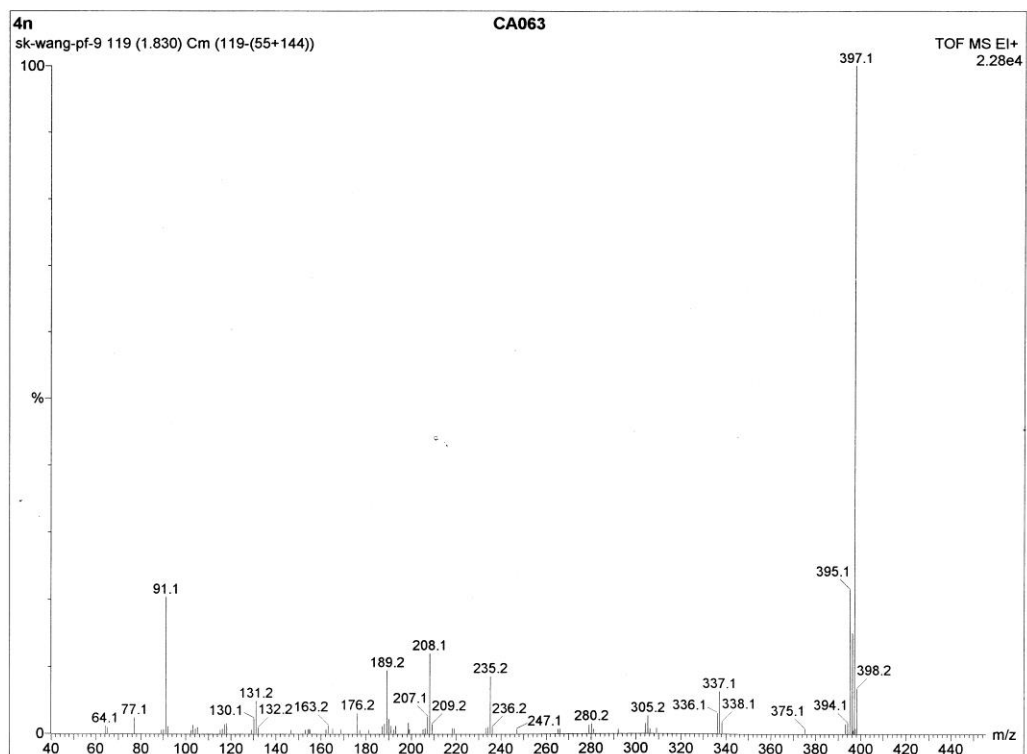

40

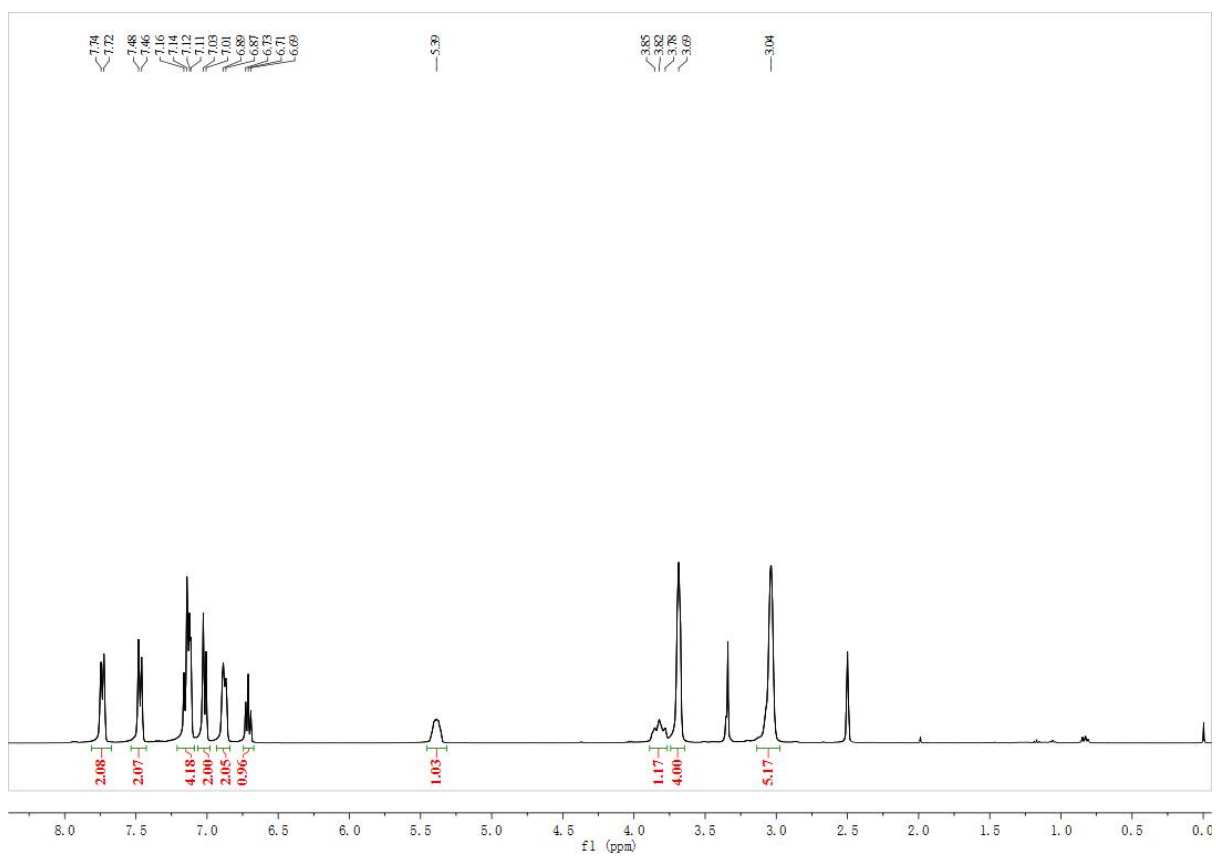



4p

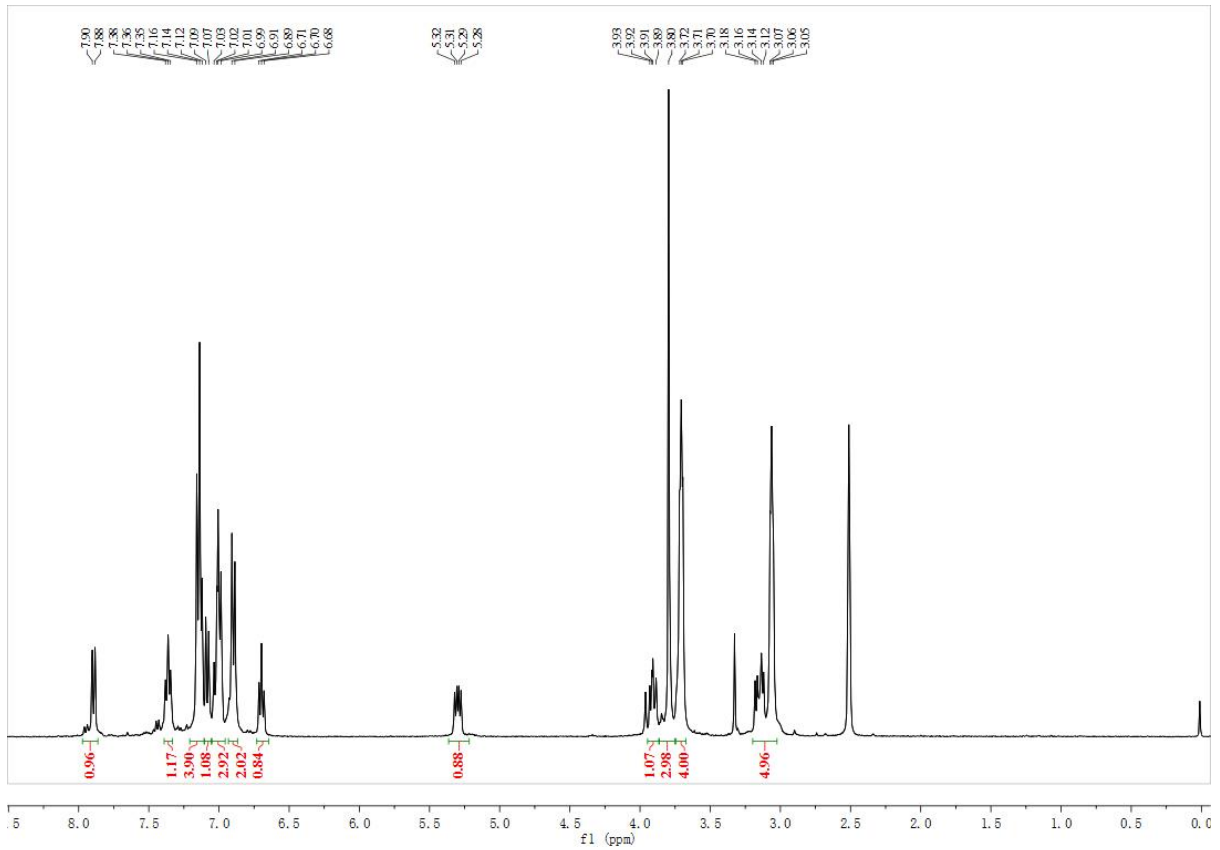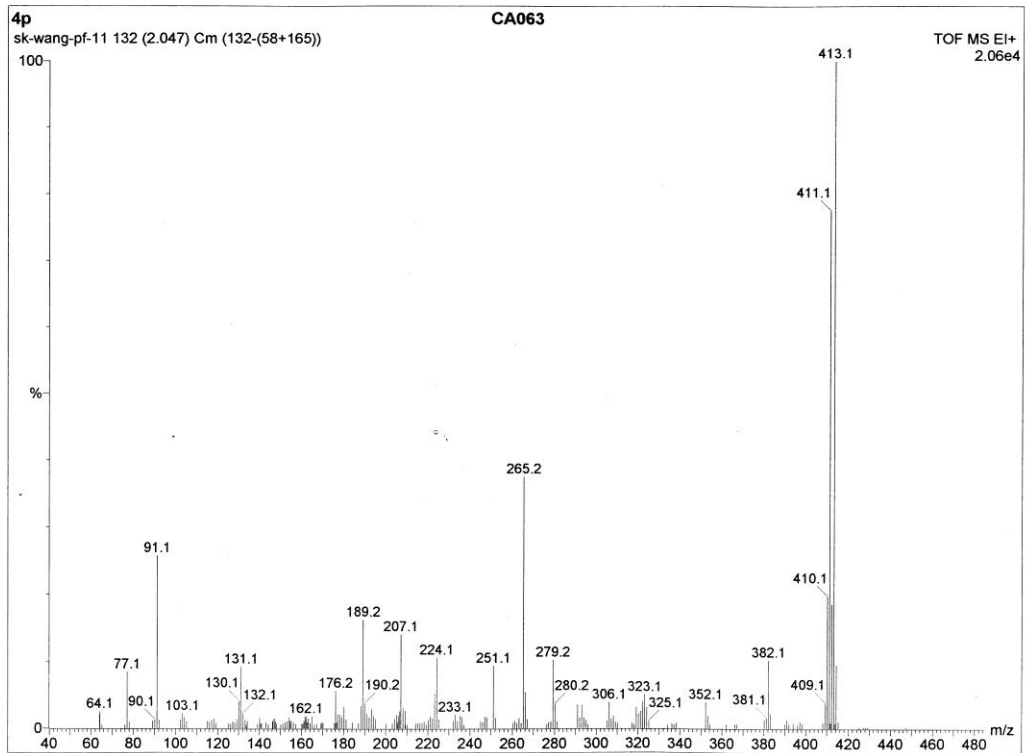

4q

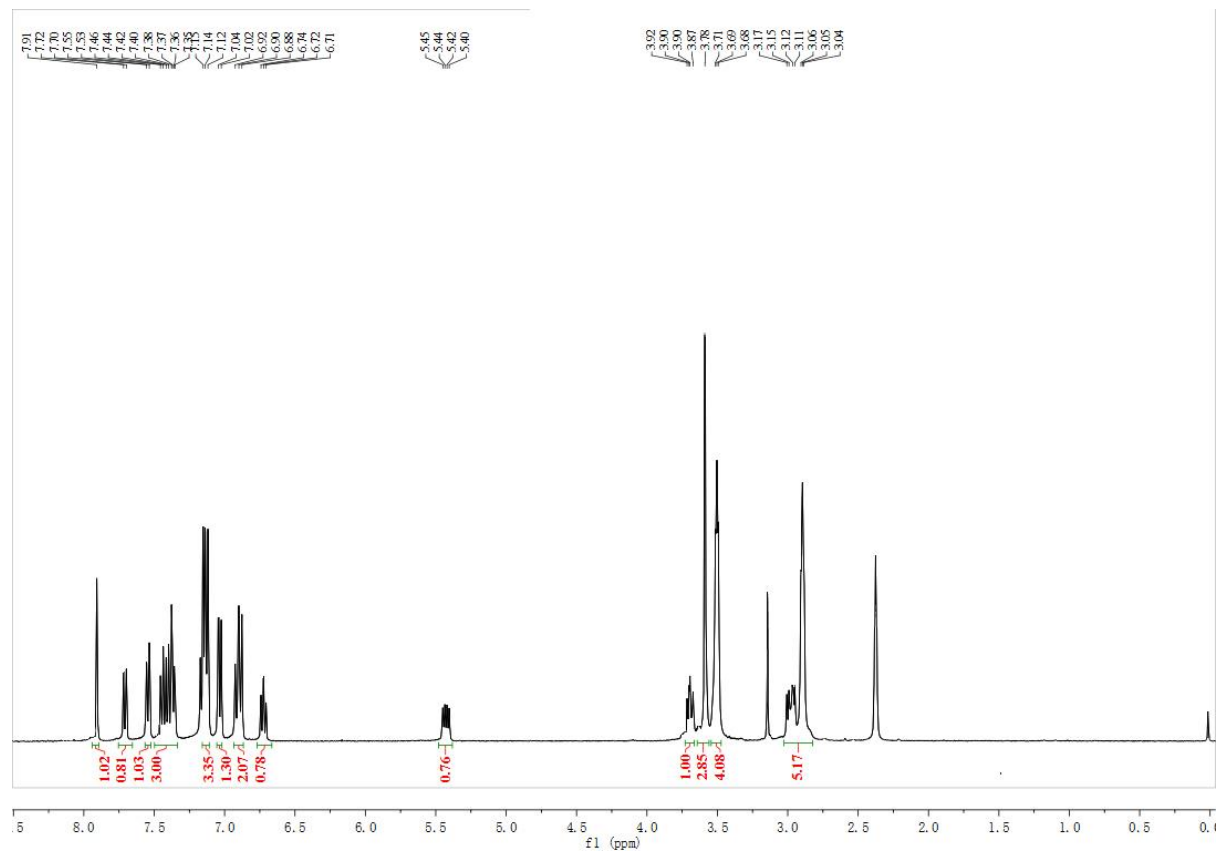

4r

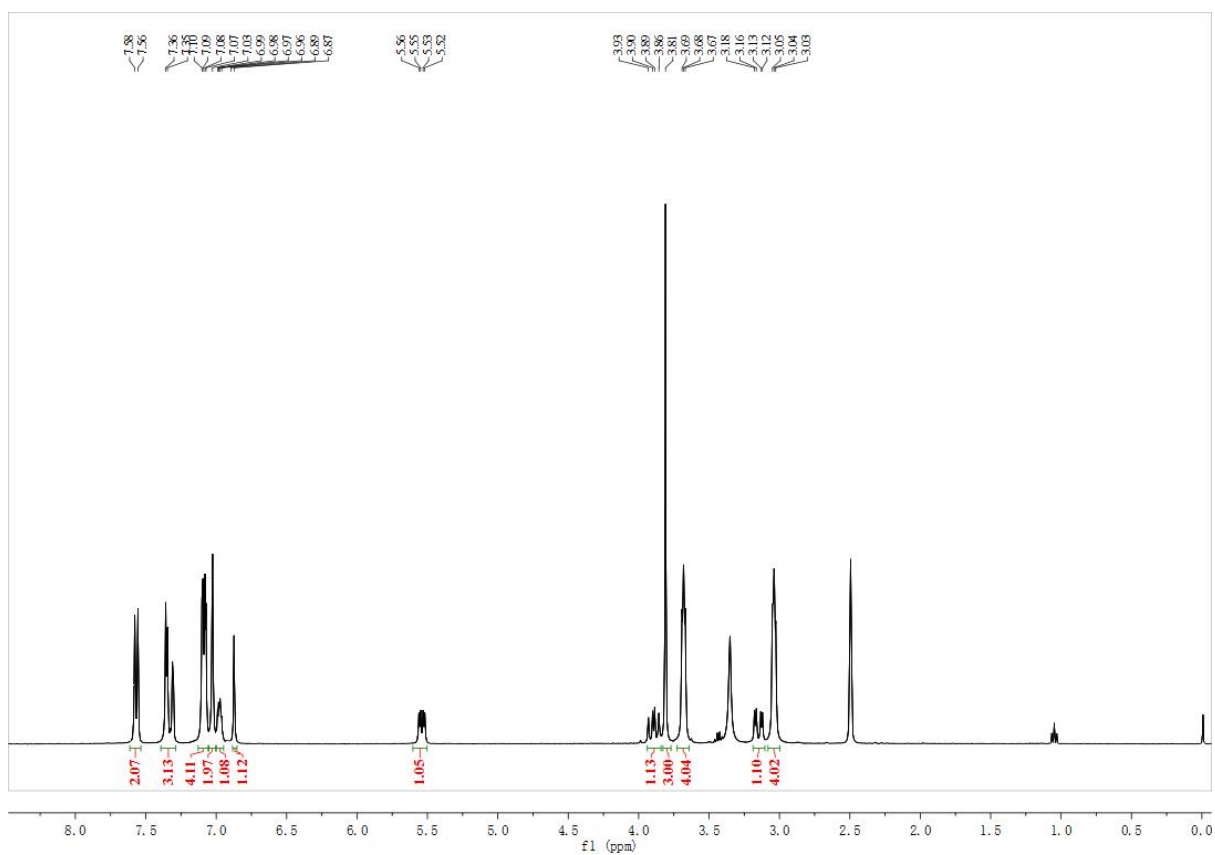

4s

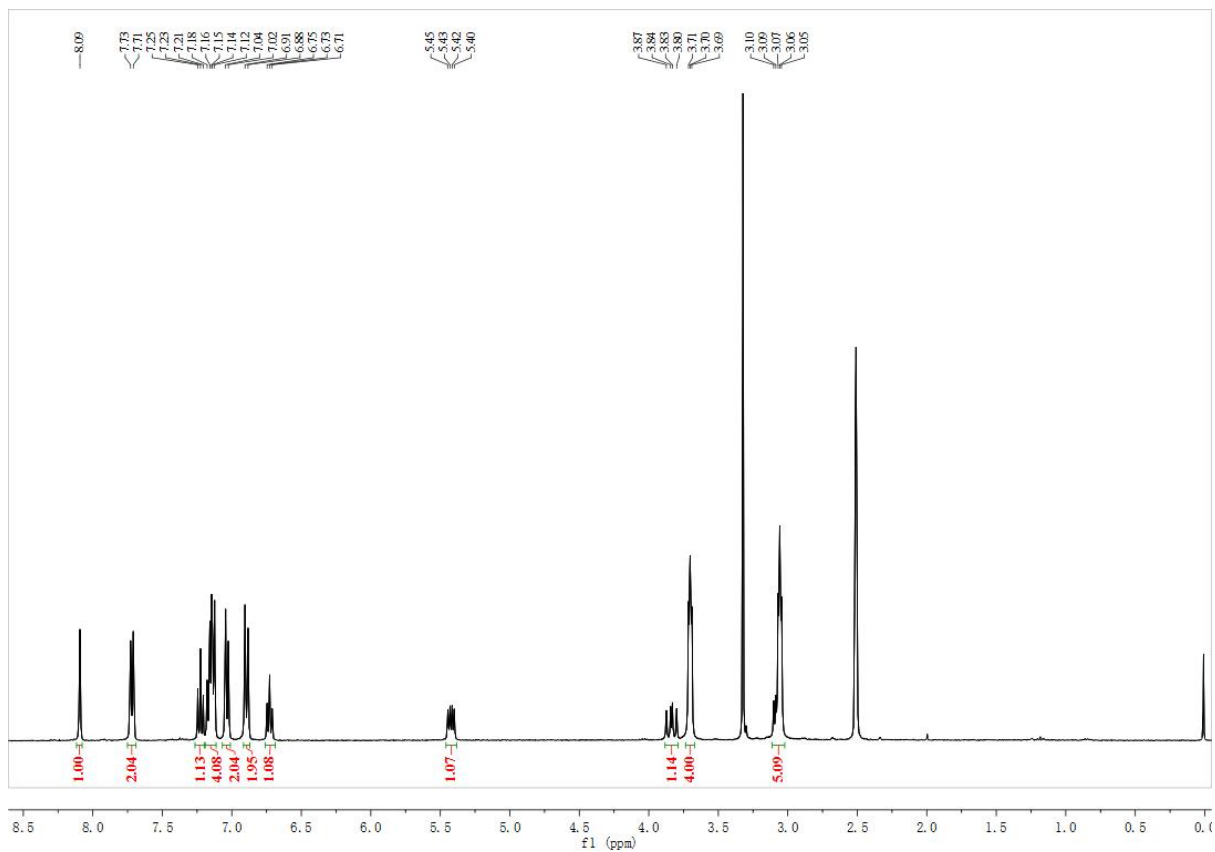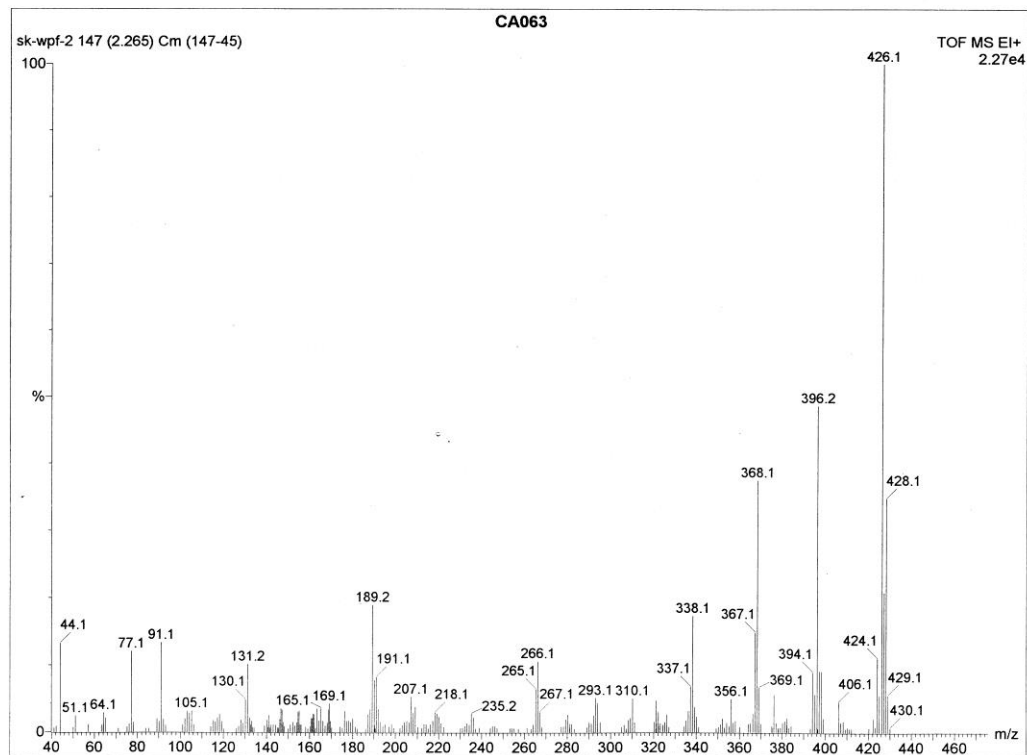

Supplement: c4ra15201h1.pdf [file c4ra15201h1.pdf]
